# Supplementary material for: Circular RNA in Chemonaive Lymph Node Negative Colon Cancer Patients
Source: MDPI journal article supplement (doi:10.3390/cancers13081903), 2021-04-15
Supplement: s1 [file s1]

# Circular RNA in Chemo-naïve Lymph Node Negative Colon Cancer Patients

Inge van den Berg, Marcel Smid, Robert R.J. Coebergh van den Braak, Carolien H.M. van Deurzen, Vanja de Weerd, John A. Foekens, Jan N.M. IJzermans, John W.M. Martens and Saskia M. Wilting

**Table S1.** Candidate circular RNA validation by Sanger Sequencing.

| Circular Region          | Ensemble Gene ID | Gene     | Oligonucleotide | Sequence (5'–3')        | Tm (°C) | Amplicon Size (bp) |
|--------------------------|------------------|----------|-----------------|-------------------------|---------|--------------------|
| chr2:199368605-199433515 | ENSG00000119042  | SATB2    | Forward         | CAAACCTCGGCGTGTTCTTCTC  | 59.9    | 148                |
|                          |                  |          | Reverse         | AATGTGTCAGCAACCAAGTGC   | 58.3    |                    |
| chr7:152309966-152315339 | ENSG00000055609  | KMT2C    | Forward         | ATCCAGGCGTTATTCTGAATTGT | 59.9    | 147                |
|                          |                  |          | Reverse         | TGCCAGATGGAAGAACCATTG   | 60.71   |                    |
| chr12:95208843-95211268  | ENSG00000180263  | FGD6     | Forward         | ATTTGCCACAACAACTTGGG    | 60.1    | 149                |
|                          |                  |          | Reverse         | CAGCATGGAGGACGCTGAT     | 58.9    |                    |
| chr2:207976651-207977587 | ENSG00000178385  | PLEKH M3 | Forward         | CTGCATAACAGCTTTGCCAGT   | 58.3    | 135                |
|                          |                  |          | Reverse         | TGTCTTTGGAACGAGGACTCA   | 57.9    |                    |

**Table S2.** circRNAs that were observed in 20 samples or more.

| Circular Region           | Ensemble Gene ID | Gene     | Exons | # Samples | R *   | circID           |
|---------------------------|------------------|----------|-------|-----------|-------|------------------|
| chr4:143543509-143543973  | ENSG00000153147  | SMARCA5  | 15-16 | 177       | 0.295 | hsa_circ_0001445 |
| chr11:33286413-33287512   | ENSG00000110422  | HIPK3    | 2     | 177       | 0.541 | hsa_circ_0000284 |
| chr7:100023419-100024308  | ENSG00000106261  | ZKSCAN1  | 2-3   | 177       | 0.539 | hsa_circ_0001727 |
| chr4:152411303-152412530  | ENSG00000109670  | FBXW7    | 2     | 177       | 0.437 | hsa_circ_0001451 |
| chr1:117402186-117420650  | ENSG00000198162  | MAN1A2   | 2-5   | 172       | 0.489 | hsa_circ_0000118 |
| chr14:99458279-99465814   | ENSG00000183576  | SETD3    | 6-2   | 170       | 0.352 | hsa_circ_0000567 |
| chr5:123545417-123557565  | ENSG00000151292  | CSNK1G3  | 2-3   | 166       | 0.52  | hsa_circ_0001522 |
| chr14:32090502-32094387   | ENSG00000100852  | ARHGAP5  | 3-2   | 162       | 0.64  | hsa_circ_0031583 |
| chr19:23358430-23362726   | ENSG00000167232  | ZNF91    | 1-4   | 161       | 0.756 |                  |
| chr14:32090502-32117288   | ENSG00000100852  | ARHGAP5  | 3     | 157       | 0.607 | hsa_circ_0031584 |
| chr5:168488602-168494651  | ENSG00000113643  | RARS     | 2-5   | 156       | 0.276 | hsa_circ_0001550 |
| chr20:32366384-32369124   | ENSG00000171456  | ASXL1    | 2-4   | 152       | 0.415 | hsa_circ_0001136 |
| chr10:7797047-7802855     | ENSG00000165629  | ATP5C1   | 3-8   | 151       | 0.341 | hsa_circ_0007292 |
| chr8:51860845-51861247    | ENSG00000168300  | PCMTD1   | 3     | 150       | 0.431 | hsa_circ_0001801 |
| chr5:137985257-137988316  | ENSG00000031003  | FAM13B   | 10-8  | 150       | 0.235 | hsa_circ_0001535 |
| chr2:61522611-61533904    | ENSG00000082898  | XPO1     | 4-2   | 147       | 0.194 | hsa_circ_0001017 |
| chr13:32517857-32527533   | ENSG00000244754  | N4BP2L2  | 5-2   | 144       | 0.463 | hsa_circ_0000471 |
| chr7:155672867-155680909  | ENSG00000184863  | RBM33    | 3-5   | 142       | 0.121 | hsa_circ_0001772 |
| chr6:47283938-47286596    | ENSG00000146072  | TNFRSF21 | 3-2   | 141       | 0.548 | hsa_circ_0001610 |
| chr8:61680968-61684189    | ENSG00000198363  | ASPH     | 3-2   | 139       | 0.525 | hsa_circ_0084615 |
| chr6:4891713-4892380      | ENSG00000153046  | CDYL     | 4     | 139       | 0.524 | hsa_circ_0008285 |
| chr7:22291175-22318038    | ENSG00000136237  | RAPGEF5  | 1-2   | 128       | 0.474 | hsa_circ_0001681 |
| chr17:20204333-20205913   | ENSG00000128487  | SPECC1   | 4     | 122       | 0.678 | hsa_circ_0000745 |
| chr15:58912563-58917000   | ENSG00000137776  | SLTM     | 5-3   | 119       | 0.203 | hsa_circ_0000605 |
| chr15:64499293-64500167   | ENSG00000180357  | ZNF609   | 2-1   | 117       | 0.368 | hsa_circ_0000615 |
| chr9:33971651-33973238    | ENSG00000137073  | UBAP2    | 8-7   | 116       | 0.156 | hsa_circ_0001851 |
| chr12:108652272-108654411 | ENSG00000110880  | CORO1C   | 8-7   | 115       | 0.212 | hsa_circ_0000437 |
| chr1:117402186-117442326  | ENSG00000198162  | MAN1A2   | 2-6   | 115       | 0.275 | hsa_circ_0000119 |
| chr12:69800209-69801722   | ENSG00000127328  | RAB3IP   | 7-8   | 114       | 0.293 | hsa_circ_0000419 |
| chr15:25405461-25411972   | ENSG00000114062  | UBE3A    | 4-2   | 112       | 0.356 | hsa_circ_0000586 |
| chr4:55411614-55417986    | ENSG00000134851  | TMEM165  | 2-4   | 112       | 0.339 | hsa_circ_0001414 |
| chr6:158312051-158314269  | ENSG00000130338  | TULP4    | 2-1   | 110       | 0.476 |                  |
| chr4:128992167-129003877  | ENSG00000151466  | SCLT1    | 9-6   | 109       | 0.339 | hsa_circ_0001439 |
| chr20:35714185-35725156   | ENSG00000131051  | RBM39    | 10-6  | 109       | 0.407 | hsa_circ_0004870 |
| chr11:130260856-130261930 | ENSG00000196323  | ZBTB44   | 2     | 109       | 0.317 | hsa_circ_0002484 |
| chr2:40428473-40430305    | ENSG00000183023  | SLC8A1   | 2     | 107       | 0.61  | hsa_circ_0000994 |
| chr14:96833467-96860736   | ENSG00000100749  | VRK1     | 2-11  | 105       | 0.271 | hsa_circ_0000566 |
| chr3:149846011-149921228  | ENSG00000082996  | RNF13    | 2-8   | 102       | 0.512 | hsa_circ_0001346 |
| chr6:18236452-18258406    | ENSG00000124795  | DEK      | 9-3   | 102       | 0.446 | hsa_circ_0075796 |
| chr21:36247517-36248569   | ENSG00000142197  | DOPEY2   | 20-21 | 101       | 0.388 | hsa_circ_0001187 |
| chr4:186706563-186709846  | ENSG00000083857  | FAT1     | 2     | 96        | 0.339 | hsa_circ_0001461 |
| chr7:158759486-158764854  | ENSG00000117868  | ESYT2    | 13-9  | 94        | 0.398 | hsa_circ_0001776 |
| chr2:190659158-190673153  | ENSG00000138386  | NAB1     | 2-4   | 94        | 0.661 | hsa_circ_0002024 |
| chr15:41668828-41669959   | ENSG00000174197  | MGA      | 2     | 94        | 0.09  | hsa_circ_0000591 |
| chr1:7777160-7778170      | ENSG00000049245  | VAMP3    | 3-4   | 93        | 0.05  | hsa_circ_0006354 |
| chr9:33953285-33963792    | ENSG00000137073  | UBAP2    | 12-9  | 91        | 0.247 | hsa_circ_0001847 |
| chr2:199368605-199433515  | ENSG00000119042  | SATB2    | 6-3   | 90        | 0.607 | hsa_circ_0003915 |
| chr3:56592970-56594029    | ENSG00000180376  | CCDC66   | 8-9   | 90        | 0.295 | hsa_circ_0001313 |
| chr9:135881633-135883079  | ENSG00000130559  | CAMSAP1  | 3-2   | 90        | 0.197 | hsa_circ_0001900 |
| chr10:126970702-127127765 | ENSG00000150760  | DOCK1    | 2-27  | 89        | 0.504 | hsa_circ_0020397 |
| chr9:93471141-93498887    | ENSG00000048828  | FAM120A  | 2     | 89        | 0.403 | hsa_circ_0001875 |
| chr14:22909483-22911404   | ENSG00000100461  | RBM23    | 3-2   | 88        | 0.154 | hsa_circ_0000524 |
| chr8:141253989-141254630  | ENSG00000022567  | SLC45A4  | 1-2   | 87        | 0.05  | hsa_circ_0001829 |
| chr7:22308339-22318038    | ENSG00000136237  | RAPGEF5  | 5-2   | 86        | 0.284 |                  |
| chr1:31915895-31919659    | ENSG00000184007  | PTP4A2   | 2-2   | 86        | 0.439 | hsa_circ_0007364 |
| chr3:158122103-158123992  | ENSG00000174891  | RSRC1    | 2-3   | 85        | 0.295 | hsa_circ_0001355 |
| chr1:205616478-205623892  | ENSG00000158711  | ELK4     | 5-2   | 84        | 0.405 | hsa_circ_0000175 |
| chr17:45475100-45475727   | ENSG00000225190  | PLEKHM1  | 4     | 84        | 0.383 | hsa_circ_0044177 |
| chr7:39987599-40002032    | ENSG00000065883  | CDK13    | 2-5   | 84        | 0.481 | hsa_circ_0001699 |
| chr21:15762891-15766142   | ENSG00000155313  | USP25    | 2-3   | 84        | 0.11  | hsa_circ_0001178 |
| chr4:128074460-128077963  | ENSG00000138709  | LARP1B   | 2-4   | 79        | 0.32  | hsa_circ_0001438 |

|                           |                 |                 |       |    |        |                  |
|---------------------------|-----------------|-----------------|-------|----|--------|------------------|
| chr13:60439688-60467380   | ENSG00000083544 | <i>TDRD3</i>    | 2-4   | 77 | 0.529  | hsa_circ_0003441 |
| chr17:1050050-1100736     | ENSG00000159842 | <i>ABR</i>      | 16-3  | 76 | 0.468  | hsa_circ_0007919 |
| chr4:87195324-87195691    | ENSG00000145332 | <i>KLHL8</i>    | 2     | 76 | 0.313  | hsa_circ_0002538 |
| chr1:1223244-1223969      | ENSG00000078808 | <i>SDF4</i>     | 4-3   | 76 | 0.224  | hsa_circ_0000002 |
| chr2:72718103-72733119    | ENSG00000144036 | <i>EXOC6B</i>   | 6-3   | 75 | 0.287  | hsa_circ_0009043 |
| chr9:111386377-111391825  | ENSG00000136813 | <i>KIAA0368</i> | 31-28 | 75 | -0.072 | hsa_circ_0001882 |
| chr8:18799295-18804899    | ENSG00000156011 | <i>PSD3</i>     | 8-5   | 73 | 0.463  | hsa_circ_0004458 |
| chr12:32598497-32611284   | ENSG00000139132 | <i>FGD4</i>     | 5-10  | 72 | 0.555  | hsa_circ_0025843 |
| chr9:110972073-110973559  | ENSG00000198121 | <i>LPAR1</i>    | 3-2   | 71 | 0.494  | hsa_circ_0087960 |
| chr18:12999421-13019207   | ENSG00000101639 | <i>CEP192</i>   | 2-9   | 70 | 0.564  | hsa_circ_0000831 |
| chr12:46229153-46243315   | ENSG00000111371 | <i>SLC38A1</i>  | 5-2   | 70 | 0.383  | hsa_circ_0000396 |
| chr4:37631385-37638505    | ENSG00000181826 | <i>RELL1</i>    | 6-4   | 70 | 0.381  | hsa_circ_0001400 |
| chr6:158282263-158314269  | ENSG00000130338 | <i>TULP4</i>    | 1-2   | 69 | 0.406  |                  |
| chr5:95755396-95763621    | ENSG00000164292 | <i>RHOBTB3</i>  | 6-7   | 69 | 0.575  | hsa_circ_0007444 |
| chr3:170359699-170361430  | ENSG00000136603 | <i>SKIL</i>     | 2     | 67 | 0.543  | hsa_circ_0067938 |
| chr6:116689320-116692393  | ENSG00000196911 | <i>KPNA5</i>    | 3-5   | 66 | 0.31   |                  |
| chr16:85633914-85634133   | ENSG00000131149 | <i>GSE1</i>     | 2     | 65 | 0.19   | hsa_circ_0000722 |
| chr5:73074742-73077494    | ENSG00000157107 | <i>FCHO2</i>    | 20-21 | 65 | 0.421  | hsa_circ_0002490 |
| chr2:61522611-61526522    | ENSG00000082898 | <i>XPO1</i>     | 4-3   | 65 | 0.235  | hsa_circ_0001016 |
| chr3:170136419-170149245  | ENSG00000173889 | <i>PHC3</i>     | 7-5   | 64 | 0.631  | hsa_circ_0001359 |
| chr21:29321221-29329694   | ENSG00000156273 | <i>BACH1</i>    | 2-4   | 63 | 0.404  | hsa_circ_0001181 |
| chr14:65561337-65561767   | ENSG00000033170 | <i>FUT8</i>     | 3     | 63 | 0.519  | hsa_circ_0003028 |
| chr12:120154970-120155720 | ENSG00000089154 | <i>GCN1L1</i>   | 31-29 | 63 | 0.144  | hsa_circ_0000448 |
| chr12:27714780-27724187   | ENSG00000061794 | <i>MRPS35</i>   | 2-5   | 62 | 0.453  | hsa_circ_0000384 |
| chr14:21503173-21503882   | ENSG00000165819 | <i>METTL3</i>   | 2     | 61 | -0.012 | hsa_circ_0000523 |
| chr15:89113725-89116522   | ENSG00000140526 | <i>ABHD2</i>    | 2-3   | 61 | 0.397  | hsa_circ_0007099 |
| chr20:58438945-58441084   | ENSG00000124164 | <i>VAPB</i>     | 4-5   | 61 | 0.436  | hsa_circ_0001173 |
| chr2:58221942-58232113    | ENSG00000115392 | <i>FANCL</i>    | 5-2   | 60 | 0.559  | hsa_circ_0001009 |
| chr1:23030469-23050521    | ENSG00000004487 | <i>KDM1A</i>    | 2-3   | 59 | 0.133  | hsa_circ_0009061 |
| chr18:12999421-13030609   | ENSG00000101639 | <i>CEP192</i>   | 2-11  | 58 | 0.509  |                  |
| chr7:24623666-24668661    | ENSG00000105926 | <i>MPP6</i>     | 2-9   | 58 | 0.762  | hsa_circ_0001686 |
| chr1:155853276-155853807  | ENSG00000116580 | <i>GON4L</i>    | 2     | 58 | -0.28  | hsa_circ_0000139 |
| chr8:130152736-130180881  | ENSG00000153317 | <i>ASAP1</i>    | 7-8   | 58 | 0.253  | hsa_circ_0008934 |
| chr7:129014979-129018158  | ENSG00000064419 | <i>TNPO3</i>    | 4-2   | 58 | 0.208  | hsa_circ_0001741 |
| chr9:86305192-86310018    | ENSG00000083223 | <i>ZCCHC6</i>   | 24-20 | 57 | 0.419  | hsa_circ_0001869 |
| chr4:185247294-185267156  | ENSG00000109762 | <i>SNX25</i>    | 2-5   | 57 | 0.618  | hsa_circ_0004874 |
| chr7:100812747-100813209  | ENSG00000196411 | <i>EPHB4</i>    | 12-11 | 55 | 0.342  | hsa_circ_0001730 |
| chr19:12928342-12928848   | ENSG00000179115 | <i>FARSA</i>    | 8-6   | 55 | 0.025  | hsa_circ_0000896 |
| chr2:112299849-112300030  | ENSG00000188177 | <i>ZC3H6</i>    | 2-2   | 55 | 0.556  | hsa_circ_0001062 |
| chr3:170145423-170149245  | ENSG00000173889 | <i>PHC3</i>     | 6-5   | 54 | 0.69   | hsa_circ_0001360 |
| chrX:131749306-131794467  | ENSG00000213468 | <i>FIRRE</i>    | 10-5  | 53 | 0.808  | hsa_circ_0001944 |
| chr9:37126312-37126943    | ENSG00000147905 | <i>ZCCHC7</i>   | 2     | 52 | 0.407  | hsa_circ_0001860 |
| chr3:63912588-63913226    | ENSG00000163635 | <i>ATXN7</i>    | 4     | 52 | 0.25   | hsa_circ_0007761 |
| chr1:224952670-224974154  | ENSG00000185842 | <i>DNAH14</i>   | 2-8   | 51 | 0.412  | hsa_circ_0016600 |
| chr1:41070595-41075452    | ENSG00000010803 | <i>SCMH1</i>    | 9-8   | 50 | -0.025 | hsa_circ_0000061 |
| chr13:95757644-95763954   | ENSG00000102580 | <i>DNAJC3</i>   | 5-9   | 50 | 0.241  |                  |
| chr1:155438327-155459899  | ENSG00000116539 | <i>ASH1L</i>    | 5-4   | 49 | 0.034  | hsa_circ_0003247 |
| chr4:76134175-76144474    | ENSG00000138750 | <i>NUP54</i>    | 4-2   | 49 | 0.199  | hsa_circ_0070039 |
| chr2:99169550-99171430    | ENSG00000158411 | <i>MITD1</i>    | 3-4   | 48 | 0.045  | hsa_circ_0001050 |
| chr8:140864312-140890770  | ENSG00000169398 | <i>PTK2</i>     | 5-3   | 48 | 0.031  | hsa_circ_0002483 |
| chr13:75560753-75569508   | ENSG00000118939 | <i>UCHL3</i>    | 3-6   | 48 | 0.353  | hsa_circ_0000494 |
| chr3:172247533-172251542  | ENSG00000075420 | <i>FNDC3B</i>   | 5-6   | 47 | 0.362  | hsa_circ_0006156 |
| chr10:101667886-101676437 | ENSG00000107829 | <i>FBXW4</i>    | 5-2   | 47 | -0.051 | hsa_circ_0008362 |
| chr8:127890589-127890999  | ENSG00000249859 | <i>PVT1</i>     | 3-2   | 47 | 0.356  | hsa_circ_0001821 |
| chr15:62007308-62013993   | ENSG00000129003 | <i>VPS13C</i>   | 13-8  | 46 | 0.166  | hsa_circ_0000607 |
| chr10:110964125-110985766 | ENSG00000108061 | <i>SHOC2</i>    | 2-3   | 46 | 0.349  | hsa_circ_0020028 |
| chr16:69370483-69372356   | ENSG00000132604 | <i>TERF2</i>    | 5-4   | 46 | -0.069 |                  |
| chr3:125313308-125331239  | ENSG00000163848 | <i>ZNF148</i>   | 4-2   | 46 | 0.363  | hsa_circ_0001333 |
| chr14:39179091-39179463   | ENSG00000100941 | <i>PNN</i>      | 6-8   | 46 | -0.02  |                  |
| chr8:94664697-94665197    | ENSG00000104413 | <i>ESRP1</i>    | 7-9   | 46 | 0.291  | hsa_circ_0084927 |
| chr2:147896301-147899899  | ENSG00000121989 | <i>ACVR2A</i>   | 2-4   | 45 | 0.341  | hsa_circ_0001073 |
| chr19:8455405-8463687     | ENSG00000099783 | <i>HNRNPM</i>   | 2-5   | 45 | -0.223 | hsa_circ_0006382 |
| chr7:152309966-152315339  | ENSG00000055609 | <i>KMT2C</i>    | 6-4   | 45 | -0.033 | hsa_circ_0001769 |
| chr17:51263274-51268905   | ENSG00000011260 | <i>UTP18</i>    | 2-4   | 44 | 0.132  | hsa_circ_0002789 |

|                           |                 |                      |       |    |        |                  |
|---------------------------|-----------------|----------------------|-------|----|--------|------------------|
| chr14:102040236-102040674 | ENSG00000197102 | <i>DYNC1H1</i>       | 63-64 | 44 | -0.212 | hsa_circ_0002398 |
| chr20:33619517-33623297   | ENSG00000078699 | <i>CBFA2T2</i>       | 4-5   | 44 | 0.264  | hsa_circ_0003426 |
| chr4:73090667-73092301    | ENSG00000132466 | <i>ANKRD17</i>       | 29    | 44 | 0.204  | hsa_circ_0007883 |
| chr7:23611171-23611554    | ENSG00000169193 | <i>CCDC126</i>       | 3     | 43 | 0.49   | hsa_circ_0001684 |
| chr5:57246300-57251142    | ENSG00000062194 | <i>GPBP1</i>         | 8-11  | 43 | 0.253  | hsa_circ_0072547 |
| chr7:158788004-158799073  | ENSG00000117868 | <i>ESYT2</i>         | 6-2   | 43 | 0.551  | hsa_circ_0001777 |
| chr18:21765772-21779686   | ENSG00000101752 | <i>MIB1</i>          | 2-6   | 42 | 0.513  | hsa_circ_0000835 |
| chr5:128138597-128152806  | ENSG00000064651 | <i>SLC12A2</i>       | 8-15  | 42 | 0.598  | hsa_circ_0006034 |
| chr7:156826605-156836886  | ENSG00000105983 | <i>LMBR1</i>         | 4-2   | 42 | 0.345  | hsa_circ_0005939 |
| chr3:138570318-138571357  | ENSG00000114107 | <i>CEP70</i>         | 6-4   | 41 | 0.539  | hsa_circ_0002468 |
| chr12:120782655-120784594 | ENSG00000157837 | <i>SPPL3</i>         | 6-4   | 41 | -0.013 | hsa_circ_0003472 |
| chr12:123586747-123590450 | ENSG00000086598 | <i>TMED2</i>         | 2-3   | 41 | 0.265  | hsa_circ_0000458 |
| chr2:202464809-202467690  | ENSG00000204217 | <i>BMPR2</i>         | 2-3   | 41 | 0.183  | hsa_circ_0003218 |
| chr2:8908621-8958643      | ENSG00000143797 | <i>MBOAT2</i>        | 4-2   | 40 | 0.71   | hsa_circ_0000972 |
| chr2:88782734-88792495    | ENSG00000230006 | <i>ANKRD36BP2</i>    | 4-12  | 40 | 0.465  |                  |
| chr4:128074460-128082306  | ENSG00000138709 | <i>LARP1B</i>        | 2-5   | 40 | 0.493  | hsa_circ_0007619 |
| chr5:145817894-145826201  | ENSG00000186314 | <i>PRELID2</i>       | 5-2   | 39 | 0.562  | hsa_circ_0006528 |
| chr1:117402186-117405646  | ENSG00000198162 | <i>MAN1A2</i>        | 2-3   | 39 | 0.444  | hsa_circ_0000116 |
| chr12:95208843-95211268   | ENSG00000180263 | <i>FGD6</i>          | 2     | 38 | 0.39   |                  |
| chr2:233388257-233390484  | ENSG00000077044 | <i>DGKD</i>          | 2-3   | 38 | -0.242 | hsa_circ_0001112 |
| chr8:60741259-60743098    | ENSG00000171316 | <i>CHD7</i>          | 2     | 38 | 0.253  | hsa_circ_0084582 |
| chr19:47264603-47264947   | ENSG00000105321 | <i>CCDC9</i>         | 6-7   | 38 | 0.375  | hsa_circ_0000944 |
| chr11:77624963-77625819   | ENSG00000074201 | <i>CLNS1A</i>        | 4-3   | 38 | 0.451  | hsa_circ_0000343 |
| chr12:100282943-100298176 | ENSG00000136021 | <i>SCYL2</i>         | 2-4   | 38 | 0.178  | hsa_circ_0006258 |
| chr15:90439332-90443479   | ENSG00000140575 | <i>IQGAP1</i>        | 6-9   | 37 | 0.532  | hsa_circ_0000651 |
| chr7:66127704-66134375    | ENSG00000249319 | <i>AC068533.7</i>    | 8-10  | 37 |        | hsa_circ_0004604 |
| chr4:177353308-177360678  | ENSG00000109674 | <i>NEIL3</i>         | 8-9   | 37 | 0.307  | hsa_circ_0001460 |
| chr10:68959806-68960250   | ENSG00000165732 | <i>DDX21</i>         | 2     | 37 | 0.266  | hsa_circ_0008865 |
| chr6:13579451-13584226    | ENSG00000124523 | <i>SIRT5</i>         | 2-3   | 36 | 0.098  | hsa_circ_0007218 |
| chr1:59339958-59378838    | ENSG00000172456 | <i>FGGY</i>          | 3-5   | 36 | 0.218  | hsa_circ_0006633 |
| chr19:5604583-5604937     | ENSG00000130254 | <i>SAFB2</i>         | 11-10 | 36 | 0.017  | hsa_circ_0000880 |
| chr2:189791790-189818181  | ENSG00000064933 | <i>PMS1</i>          | 2-5   | 36 | 0.133  | hsa_circ_0001083 |
| chr8:37765526-37766356    | ENSG00000147471 | <i>PROSC</i>         | 2-4   | 36 | 0.184  | hsa_circ_0001788 |
| chr2:134253095-134254645  | ENSG00000152127 | <i>MGAT5</i>         | 2-3   | 35 | 0.228  | hsa_circ_0001068 |
| chr14:21230319-21234230   | ENSG00000092199 | <i>HNRNPC</i>        | 4-2   | 35 | 0.165  | hsa_circ_0003643 |
| chr3:146121112-146124230  | ENSG00000152952 | <i>PLOD2</i>         | 3-2   | 35 | 0.409  |                  |
| chr11:77619606-77625819   | ENSG00000074201 | <i>CLNS1A</i>        | 1-3   | 35 | 0.326  | hsa_circ_0023694 |
| chr5:128131067-128141982  | ENSG00000064651 | <i>SLC12A2</i>       | 5-10  | 35 | 0.242  | hsa_circ_0073762 |
| chr3:196391813-196403020  | ENSG00000163960 | <i>UBXN7</i>         | 5-3   | 35 | 0.214  | hsa_circ_0001380 |
| chr1:30992390-30995221    | ENSG00000134644 | <i>PUM1</i>          | 7-6   | 35 | 0.199  | hsa_circ_0000043 |
| chr15:32526813-32533369   | ENSG00000223509 | <i>RP11-632K20.7</i> | 1-2   | 34 | 0.579  |                  |
| chr1:805799-810171        | ENSG00000230092 | <i>RP11-206L10.8</i> | 4-2   | 34 | 0.633  | hsa_circ_0002333 |
| chr6:7176655-7189323      | ENSG00000124782 | <i>RREB1</i>         | 2-6   | 34 | -0.203 | hsa_circ_0001573 |
| chr4:102304317-102315831  | ENSG00000138821 | <i>SLC39A8</i>       | 6-3   | 33 | 0.451  | hsa_circ_0002782 |
| chr12:28225795-28259443   | ENSG00000123106 | <i>CCDC91</i>        | 2-4   | 33 | 0.451  | hsa_circ_0000386 |
| chr10:126970702-127257430 | ENSG00000150760 | <i>DOCK1</i>         | 2-29  | 33 | 0.514  | hsa_circ_0020399 |
| chr15:80120328-80122801   | ENSG00000086666 | <i>ZFAND6</i>        | 3-5   | 33 | 0.01   | hsa_circ_0000643 |
| chr5:65988635-65994865    | ENSG00000112851 | <i>ERBB2IP</i>       | 2-4   | 33 | 0.407  | hsa_circ_0001492 |
| chr1:35358925-35361790    | ENSG00000146463 | <i>ZMYM4</i>         | 3-5   | 33 | 0.172  | hsa_circ_0011536 |
| chr8:108449823-108455931  | ENSG00000104412 | <i>EMC2</i>          | 3-5   | 33 | 0.175  |                  |
| chr2:214767482-214781510  | ENSG00000138376 | <i>BARD1</i>         | 6-4   | 33 | 0.548  | hsa_circ_0001098 |
| chr2:207976651-207977587  | ENSG00000178385 | <i>PLEKHM3</i>       | 3     | 33 | -0.168 | hsa_circ_0001095 |
| chr16:47497399-47515602   | ENSG00000102893 | <i>PHKB</i>          | 3-7   | 32 | 0.118  | hsa_circ_0000698 |
| chr11:85996826-86031612   | ENSG00000073921 | <i>PICALM</i>        | 12-2  | 32 | 0.18   | hsa_circ_0023923 |
| chr20:35716740-35725156   | ENSG00000131051 | <i>RBM39</i>         | 9-6   | 32 | 0.479  | hsa_circ_0001147 |
| chr10:84438512-84477665   | ENSG00000107771 | <i>CCSER2</i>        | 6-9   | 32 | 0.532  | hsa_circ_0018998 |
| chr6:138943513-138944623  | ENSG00000135597 | <i>REPS1</i>         | 7-5   | 32 | 0.45   | hsa_circ_0004368 |
| chr4:3086939-3107424      | ENSG00000197386 | <i>HTT</i>           | 2-5   | 32 | -0.057 | hsa_circ_0001392 |
| chr4:48369849-48383785    | ENSG00000109171 | <i>SLAIN2</i>        | 2-6   | 31 | 0.413  |                  |
| chr11:73707420-73718719   | ENSG00000175582 | <i>RAB6A</i>         | 6-4   | 31 | 0.373  | hsa_circ_0000339 |
| chr11:61366045-61367999   | ENSG00000149483 | <i>TMEM138</i>       | 3-4   | 31 | 0.098  | hsa_circ_0002058 |
| chr3:138570318-138572933  | ENSG00000114107 | <i>CEP70</i>         | 6-3   | 30 | 0.382  | hsa_circ_0004524 |
| chr1:45640210-45642500    | ENSG00000159592 | <i>GPBP1L1</i>       | 7-6   | 30 | 0.149  | hsa_circ_0008774 |
| chr10:31908172-31910564   | ENSG00000165322 | <i>ARHGAP12</i>      | 1-2   | 30 | 0.536  | hsa_circ_0000231 |

|                           |                 |                      |       |    |        |                  |
|---------------------------|-----------------|----------------------|-------|----|--------|------------------|
| chr2:106158058-106166084  | ENSG00000115652 | <i>UXS1</i>          | 5-2   | 29 | 0.004  | hsa_circ_0001060 |
| chr2:201145378-201149836  | ENSG00000003402 | <i>CFLAR</i>         | 6-8   | 29 | 0.093  | hsa_circ_0001092 |
| chr5:145796442-145826201  | ENSG00000186314 | <i>PRELID2</i>       | 1-2   | 29 | 0.545  | hsa_circ_0008647 |
| chr3:71041328-71053774    | ENSG00000114861 | <i>FOXP1</i>         | 11-8  | 29 | 0.845  | hsa_circ_0008234 |
| chr11:32927157-32935436   | ENSG00000060749 | <i>QSER1</i>         | 2-4   | 29 | 0.38   | hsa_circ_0021570 |
| chr6:158580940-158589783  | ENSG00000146433 | <i>TMEM181</i>       | 3-6   | 29 | 0.348  | hsa_circ_0001661 |
| chr1:26942660-26943066    | ENSG00000090273 | <i>NUDC</i>          | 7-6   | 29 | 0.159  | hsa_circ_0005087 |
| chr11:18291442-18292977   | ENSG00000110756 | <i>HPS5</i>          | 15-14 | 29 | 0.152  | hsa_circ_0000280 |
| chr7:22266964-22318038    | ENSG00000136237 | <i>RAPGEF5</i>       | 2     | 29 | 0.337  | hsa_circ_0079557 |
| chr8:37877109-37877552    | ENSG00000156675 | <i>RAB11FIP1</i>     | 2     | 28 | 0.229  | hsa_circ_0001789 |
| chr1:155438327-155439069  | ENSG00000116539 | <i>ASH1L</i>         | 5     | 28 | 0.091  | hsa_circ_0000137 |
| chr20:35729312-35732136   | ENSG00000131051 | <i>RBM39</i>         | 5-3   | 28 | 0.341  | hsa_circ_0008817 |
| chr9:33960826-33973238    | ENSG00000137073 | <i>UBAP2</i>         | 10-7  | 28 | 0.435  | hsa_circ_0001850 |
| chr8:61618978-61653661    | ENSG00000198363 | <i>ASPH</i>          | 14-4  | 28 | 0.429  | hsa_circ_0084606 |
| chr15:41696075-41699160   | ENSG00000174197 | <i>MGA</i>           | 2-5   | 28 | -0.244 | hsa_circ_0000592 |
| chr9:37424845-37426655    | ENSG00000137106 | <i>GRHPR</i>         | 2-4   | 27 | 0.26   | hsa_circ_0001861 |
| chr5:154033791-154034968  | ENSG00000055147 | <i>FAM114A2</i>      | 4-2   | 27 | 0.45   | hsa_circ_0001546 |
| chr10:100923975-100926020 | ENSG00000119906 | <i>FAM178A</i>       | 5-6   | 27 | 0.378  | hsa_circ_0006654 |
| chr8:102360071-102361627  | ENSG00000104517 | <i>UBR5</i>          | 5-2   | 26 | 0.07   | hsa_circ_0001819 |
| chr6:13632370-13644730    | ENSG0000010017  | <i>RANBP9</i>        | 12-6  | 26 | 0.371  | hsa_circ_0001577 |
| chr6:30650994-30651467    | ENSG00000204564 | <i>C6orf136</i>      | 3-4   | 26 | 0.102  | hsa_circ_0006109 |
| chr1:20757166-20773611    | ENSG00000127483 | <i>HP1BP3</i>        | 9-5   | 26 | -0.079 | hsa_circ_0000024 |
| chr14:63998914-64022864   | ENSG00000054654 | <i>SYNE2</i>         | 27-38 | 26 | 0.099  |                  |
| chr9:125337018-125337592  | ENSG00000165219 | <i>GAPVD1</i>        | 14-15 | 26 | 0.152  | hsa_circ_0003270 |
| chr10:104008177-104018909 | ENSG00000065613 | <i>SLK</i>           | 12-14 | 26 | 0.366  | hsa_circ_0000259 |
| chrX:85303406-85308217    | ENSG00000124429 | <i>POF1B</i>         | 15-10 | 26 | 0.321  | hsa_circ_0091187 |
| chr1:70292388-70315567    | ENSG00000118454 | <i>ANKRD13C</i>      | 9-4   | 26 | 0.355  | hsa_circ_0000085 |
| chr4:105424196-105456746  | ENSG00000138777 | <i>PPA2</i>          | 7-2   | 26 | 0.431  | hsa_circ_0001434 |
| chr19:29985223-29986418   | ENSG00000105176 | <i>URI1</i>          | 3-4   | 25 | 0.116  | hsa_circ_0000921 |
| chr16:18841565-18845652   | ENSG00000157106 | <i>SMG1</i>          | 41-39 | 25 | 0.152  | hsa_circ_0006434 |
| chr7:131375424-131399434  | ENSG00000128585 | <i>MKLN1</i>         | 3-7   | 25 | 0.531  | hsa_circ_0001746 |
| chr5:36953618-36976403    | ENSG00000164190 | <i>NIPBL</i>         | 2-9   | 25 | 0.554  | hsa_circ_0001472 |
| chr9:96522506-96565484    | ENSG00000081377 | <i>CDC14B</i>        | 12-2  | 25 | 0.545  | hsa_circ_0087641 |
| chr7:92294889-92327901    | ENSG00000001629 | <i>ANKIB1</i>        | 2-5   | 25 | 0.332  |                  |
| chr10:124681607-124682380 | ENSG00000258539 | <i>RP11-12J10.3</i>  | 9     | 25 | -0.252 | hsa_circ_0000267 |
| chr2:230442937-230450256  | ENSG00000067066 | <i>SP100</i>         | 3-8   | 24 | 0.023  | hsa_circ_0003922 |
| chr5:176943335-176958155  | ENSG00000087206 | <i>UIMC1</i>         | 10-7  | 24 | -0.07  | hsa_circ_0001558 |
| chr9:93471141-93476339    | ENSG00000048828 | <i>FAM120A</i>       | 2-3   | 24 | 0.419  | hsa_circ_0008193 |
| chr8:37870420-37877552    | ENSG00000156675 | <i>RAB11FIP1</i>     | 4-2   | 24 | 0.533  | hsa_circ_0005630 |
| chr10:84371014-84373816   | ENSG00000107771 | <i>CCSER2</i>        | 2-3   | 24 | 0.627  | hsa_circ_0018992 |
| chr20:41533050-41551361   | ENSG00000124177 | <i>CHD6</i>          | 3-2   | 24 | 0.218  | hsa_circ_0001159 |
| chr2:238182065-238185288  | ENSG00000132323 | <i>ILKAP</i>         | 9-6   | 24 | 0.278  | hsa_circ_0001116 |
| chr7:158869855-158876692  | ENSG00000126870 | <i>WDR60</i>         | 2-4   | 24 | 0.29   | hsa_circ_0001778 |
| chr1:112653598-112659780  | ENSG00000116489 | <i>CAPZA1</i>        | 4-7   | 24 | 0.144  | hsa_circ_0000109 |
| chr16:88027483-88038012   | ENSG00000172530 | <i>BANP</i>          | 7-10  | 23 | 0.052  | hsa_circ_0040823 |
| chr19:5047476-5082505     | ENSG00000127663 | <i>KDM4B</i>         | 6-9   | 23 | 0.055  | hsa_circ_0002926 |
| chr1:224952670-225007545  | ENSG00000185842 | <i>DNAH14</i>        | 2-8   | 23 | 0.637  | hsa_circ_0016601 |
| chr7:27629371-27649634    | ENSG00000106049 | <i>HIBADH</i>        | 4-2   | 23 | 0.194  | hsa_circ_0006773 |
| chr2:199380364-199433515  | ENSG00000119042 | <i>SATB2</i>         | 5-3   | 23 | 0.322  | hsa_circ_0002867 |
| chr19:40583398-40583718   | ENSG00000160410 | <i>SHKBP1</i>        | 11-12 | 23 | -0.259 | hsa_circ_0000936 |
| chr1:29154696-29154911    | ENSG00000116350 | <i>SRSF4</i>         | 4     | 23 | -0.062 | hsa_circ_0006602 |
| chr8:17743604-17755962    | ENSG00000129422 | <i>MTUS1</i>         | 2     | 23 | 0.424  | hsa_circ_0083444 |
| chr8:18765449-18804899    | ENSG00000156011 | <i>PSD3</i>          | 9-5   | 23 | 0.195  | hsa_circ_0002111 |
| chr1:20770930-20773611    | ENSG00000127483 | <i>HP1BP3</i>        | 6-5   | 23 | -0.006 | hsa_circ_0005782 |
| chr1:8655973-8656442      | ENSG00000142599 | <i>REER</i>          | 3     | 23 | -0.428 |                  |
| chr8:47396376-47407962    | ENSG00000164808 | <i>SPIDR</i>         | 6-7   | 22 | 0.017  | hsa_circ_0001798 |
| chr3:134188837-134195183  | ENSG00000163785 | <i>RYK</i>           | 9-7   | 22 | 0.102  | hsa_circ_0005768 |
| chr20:35721740-35725156   | ENSG00000131051 | <i>RBM39</i>         | 8-6   | 22 | 0.339  | hsa_circ_0001148 |
| chr4:90308244-90313048    | ENSG00000184305 | <i>CCSER1</i>        | 2-3   | 22 | 0.551  |                  |
| chr14:39276934-39279538   | ENSG00000258941 | <i>RP11-407N17.3</i> | 6-8   | 22 |        | hsa_circ_0000530 |
| chr18:9524594-9525852     | ENSG00000017797 | <i>RALBP1</i>        | 5-6   | 22 | 0.175  | hsa_circ_0005158 |
| chr17:67945409-67975959   | ENSG00000171634 | <i>BPTF</i>          | 22-27 | 22 | 0.636  | hsa_circ_0000799 |
| chr10:5794885-5800706     | ENSG00000057608 | <i>GDI2</i>          | 4-2   | 22 | -0.015 | hsa_circ_0002665 |
| chr10:89751346-89762836   | ENSG00000138182 | <i>KIF20B</i>        | 24-29 | 22 | 0.563  | hsa_circ_0019079 |

|                           |                 |             |       |    |        |                  |
|---------------------------|-----------------|-------------|-------|----|--------|------------------|
| chr16:3850297-3851010     | ENSG00000005339 | CREBBP      | 2     | 21 | -0.075 | hsa_circ_0007637 |
| chr7:131387120-131399434  | ENSG00000128585 | MKLN1       | 4-7   | 21 | 0.018  | hsa_circ_0001747 |
| chr6:110887505-110890357  | ENSG00000123505 | AMD1        | 2-4   | 21 | 0.277  | hsa_circ_0005954 |
| chr22:20933779-20934245   | ENSG00000099942 | CRKL        | 2     | 21 | 0.192  | hsa_circ_0001206 |
| chr8:98706467-98707312    | ENSG00000104375 | STK3        | 6-5   | 21 | 0.016  | hsa_circ_0004592 |
| chr20:51674153-51690820   | ENSG00000054793 | ATP9A       | 6-8   | 21 | 0.438  | hsa_circ_0004770 |
| chr3:56660731-56673726    | ENSG00000163946 | FAM208A     | 4-2   | 21 | 0.272  | hsa_circ_0001315 |
| chr19:34430576-34438767   | ENSG00000126261 | UBA2        | 3     | 21 | 0.367  | hsa_circ_0006987 |
| chr11:85996826-86003452   | ENSG00000073921 | PICALM      | 12-9  | 21 | -0.143 | hsa_circ_0023919 |
| chr5:180261684-180280609  | ENSG00000050748 | MAPK9       | 5-2   | 21 | 0.463  | hsa_circ_0001566 |
| chr3:67495798-67508904    | ENSG00000172340 | SUCLG2      | 9-7   | 21 | 0.113  | hsa_circ_0004276 |
| chr4:87046166-87047595    | ENSG00000172493 | AFF1        | 3-4   | 21 | -0.145 | hsa_circ_0001423 |
| chr17:59353215-59353527   | ENSG00000175155 | YPEL2       | 2     | 20 | 0.048  | hsa_circ_0005600 |
| chr13:112516440-112527485 | ENSG00000126216 | TUBGCP3     | 17-12 | 20 | 0.215  | hsa_circ_0000504 |
| chr4:51863437-51891852    | ENSG00000109184 | DCUN1D4     | 2-6   | 20 | 0.135  | hsa_circ_0007646 |
| chr5:16779545-16783470    | ENSG00000145555 | MYO10       | 9-5   | 20 | 0.2    |                  |
| chr9:83678441-83686156    | ENSG00000135018 | UBQLN1      | 5-2   | 20 | 0.465  | hsa_circ_0087357 |
| chr8:70213903-70216765    | ENSG00000140396 | NCOA2       | 4-3   | 20 | 0.516  |                  |
| chr13:75621763-75727099   | ENSG00000261553 | RP11-29G8.3 | 8-10  | 20 | 0.314  |                  |
| chr2:88801099-88804881    | ENSG00000230006 | ANKRD36BP2  | 13    | 20 | 0.595  |                  |
| chr16:69695136-69695380   | ENSG00000102908 | NFAT5       | 15    | 20 | 0.347  | hsa_circ_0006845 |
| chr7:139715932-139717016  | ENSG00000064393 | HIPK2       | 2     | 20 | 0.691  | hsa_circ_0001756 |
| chr7:43639449-43640650    | ENSG00000106603 | COA1        | 6-5   | 20 | 0.403  | hsa_circ_0001700 |
| chr10:34269657-34284246   | ENSG00000148498 | PARD3       | 22-21 | 20 | 0.345  | hsa_circ_0018168 |

\* R indicates the Pearson correlation between the number of circRNA reads and mRNA reads for that gene.

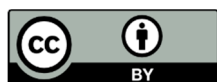

© 2021 by the authors. Licensee MDPI, Basel, Switzerland. This article is an open access article distributed under the terms and conditions of the Creative Commons Attribution (CC BY) license (<http://creativecommons.org/licenses/by/4.0/>).
